# Supplementary material for: Depositing ALD-oxides on MLD-metalcones: enhancing initial growth through O2 plasma densification
Source: Royal Society of Chemistry journal article supplement (doi:10.1039/d3dt00378g), 2023-01-01
Supplement: d3dt00378g1.pdf [file d3dt00378g1.pdf]

**Supporting information for ‘Depositing ALD-oxides on MLD-metalcones: enhancing initial growth through O<sub>2</sub> plasma densification.’**

Juan Santo Domingo Peñaranda<sup>a</sup>, Matthias M. Minjauw<sup>a</sup>, Sofie S. T. Vandebroucke<sup>a</sup>, Robin Petit<sup>b</sup>, Jolien Dendooven<sup>a</sup>, Christophe Detavernier<sup>a\*</sup>.

<sup>a</sup> *Department of Solid State Sciences, CoCooN research group, Ghent University, Krijgslaan 281, building S1, 9000 Gent (Belgium)*

<sup>b</sup> *Department of Solid State Sciences, LumiLab research group, Ghent University, Krijgslaan 281, building S1, 9000 Gent (Belgium)*

## SUPPORTING INFORMATION

### ELLIPSOMETRY FITTING PROCEDURE

The fitting procedure for *in-situ* Spectroscopic Ellipsometry measurements has already been described in our previous work:

- Santo Domingo Peñaranda, J.; Nisula, M.; Vandenbroucke, S. S. T.; Minjauw, M. M.; Li, J.; Werbrouck, A.; Keukelier, J.; Pitillas Martínez, A. I.; Dendooven, J.; Detavernier, C. Converting Molecular Layer Deposited Alucone Films into Al<sub>2</sub>O<sub>3</sub>/Alucone Hybrid Multilayers by Plasma Densification. *Dalton Transactions* **2021**, 50 (4), 1224–1232. <https://doi.org/10.1039/d0dt03896b>.

### LIST OF FIGURES

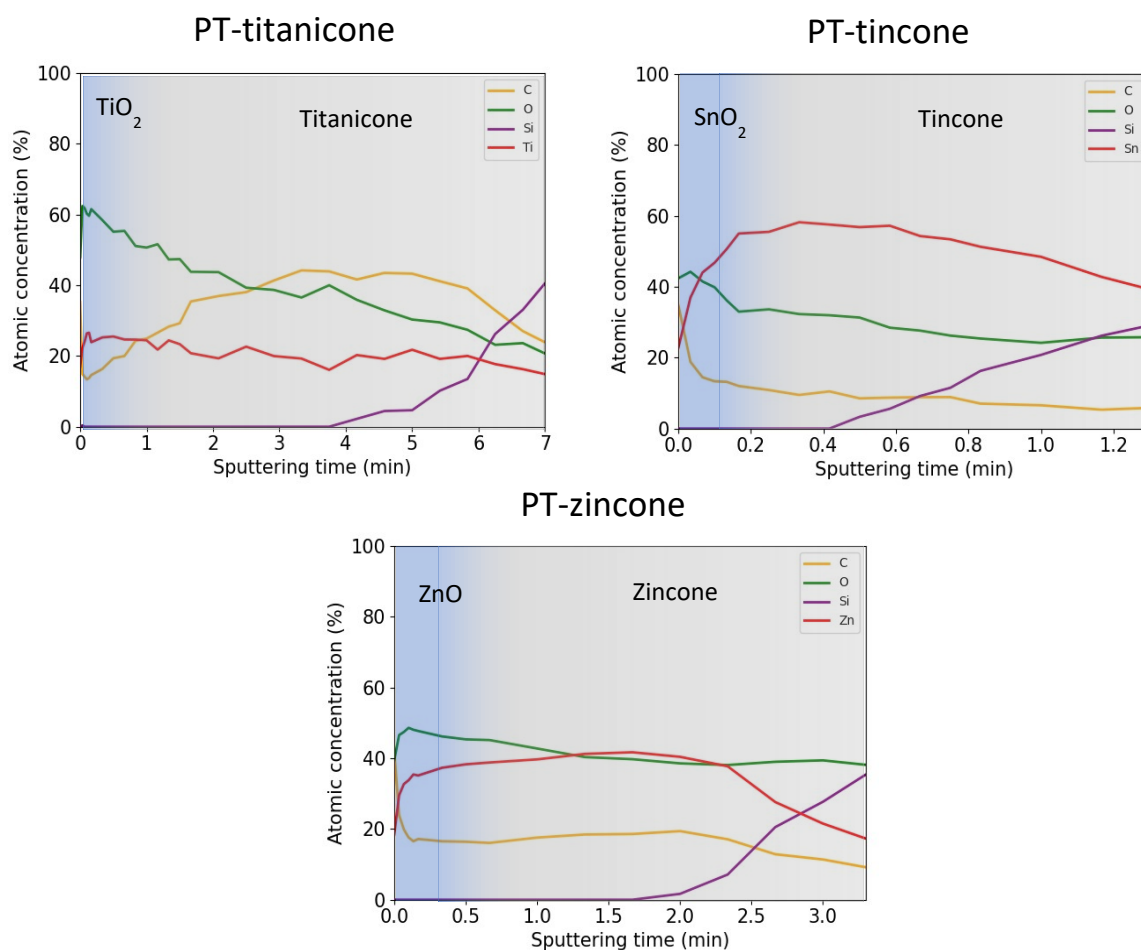

**Figure S1.** XPS depth-profiling data from all metalcones, measured right after deposition.

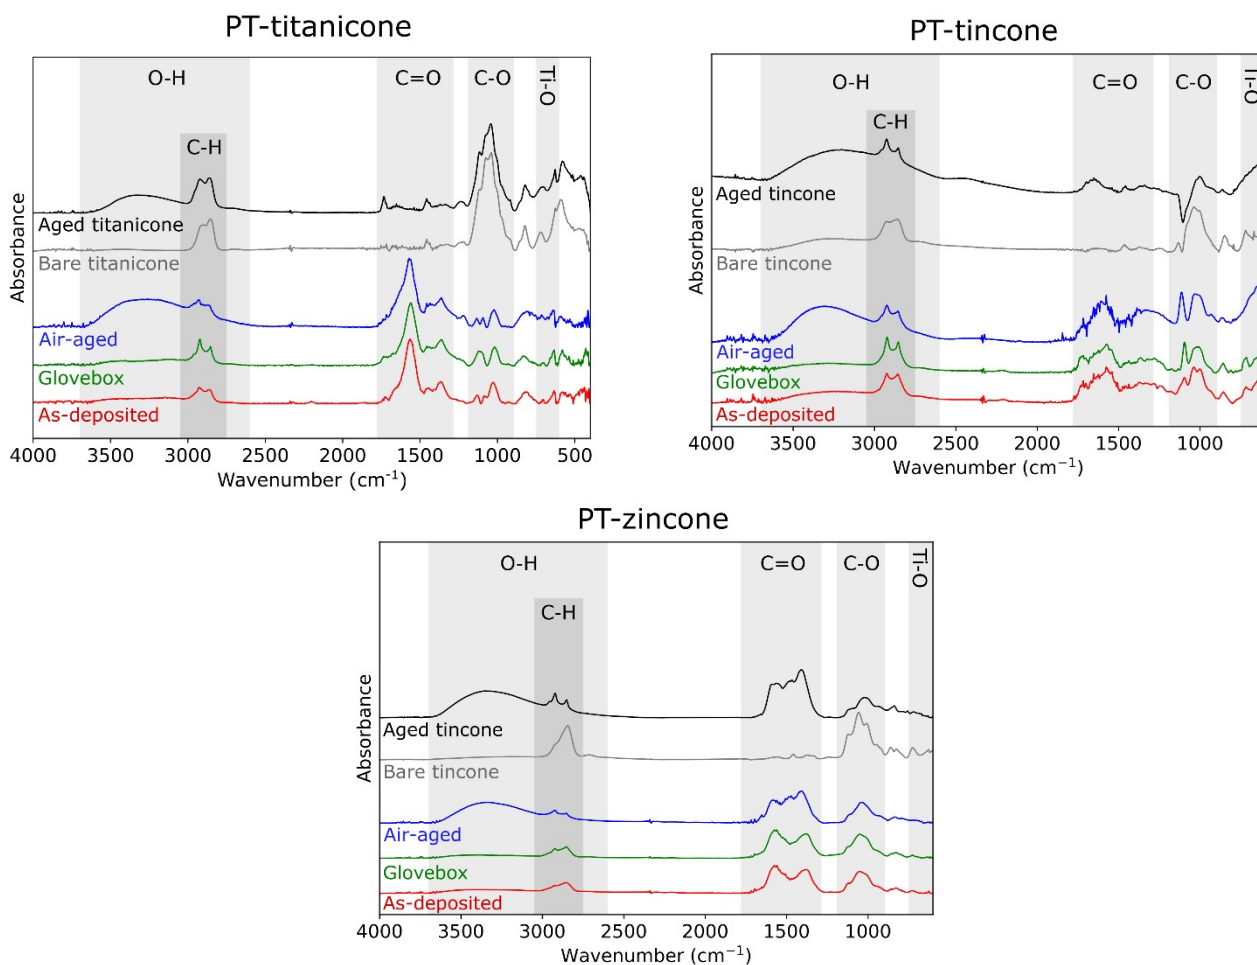

**Figure S2.** Results of aging the PT-metalcones in different conditions for 8 weeks (red/green/blue), compared against the same aging on bare metalcones (grey/black). In all cases, the original structure is maintained, but water uptake is observed (increase in the O-H band).

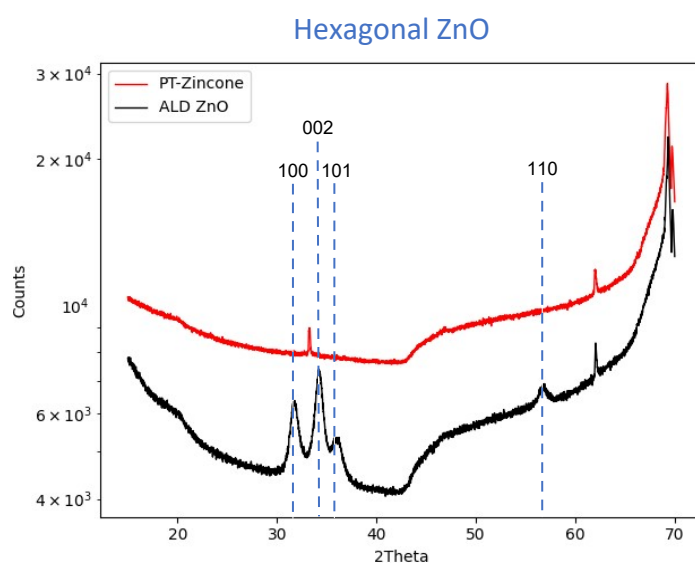

**Figure S3.** XRD measurement of a plasma-treated zincone (red), compared to a reference ZnO layer (black). The absence of peaks evidences either an amorphous film, or too thin of a layer to measure.

**LIST OF TABLES**

| <b>Titanicone</b>      |                |                |                              |
|------------------------|----------------|----------------|------------------------------|
| Layer                  | Thickness (nm) | Roughness (nm) | Density (g/cm <sup>3</sup> ) |
| <b>Si</b>              | Substrate      | 0.5            | 2.4                          |
| <b>Titanicone</b>      | 25.1           | 0.5            | 1.9                          |
| <b>TiO<sub>2</sub></b> | 1.9            | 0.5            | 5.2                          |

**Table S1.** Fitted XRR model parameters from a plasma-treated titanicone (PT-titanicone) film.

| <b>Tincone</b>         |                |                |                              |
|------------------------|----------------|----------------|------------------------------|
| Layer                  | Thickness (nm) | Roughness (nm) | Density (g/cm <sup>3</sup> ) |
| <b>Si</b>              | Substrate      | 0.5            | 2.4                          |
| <b>Tincone</b>         | 24.8           | 0.4            | 2.1                          |
| <b>SnO<sub>2</sub></b> | 1.8            | 0.8            | 8.5                          |

**Table S2.** Fitted XRR model parameters from a plasma-treated tincone (PT-tincone) film.

| <b>Zincone</b>                  |                |                |                              |
|---------------------------------|----------------|----------------|------------------------------|
| Layer                           | Thickness (nm) | Roughness (nm) | Density (g/cm <sup>3</sup> ) |
| <b>Si</b>                       | Substrate      | 1              | 2.3                          |
| <b>SiO<sub>2</sub> (native)</b> | 1.7            | 0.6            | 2.7                          |
| <b>Zincone</b>                  | 23.7           | 0.4            | 2.5                          |
| <b>ZnO</b>                      | 1.8            | 0.3            | 7.4                          |

**Table S3.** Fitted XRR model parameters from a plasma-treated zincone (PT-zincone) film.
